# Supplementary material
Source: MDPI journal article supplement (https://www.mdpi.com/2076-3417/10/11/3945)
Supplement: s1 [file s1]

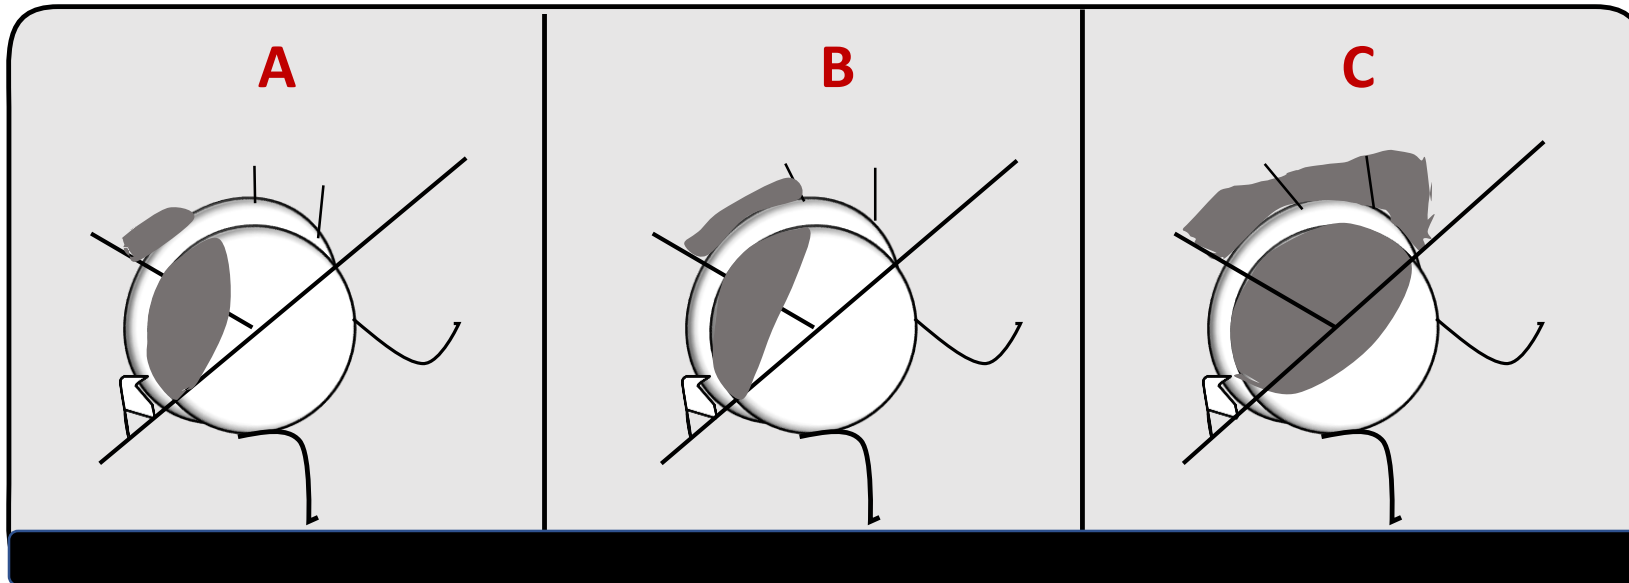

**Supplementary Figure 1.** Scientific diagram. Graphical representation of weight-bearing areas where osteochondral biopsies were harvested for histological assessment. Weight-bearing areas are described as the superior-medial face of femoral epiphysis in patients with the extent of ON involvement (A, B and C).
